# Supplementary material
Source: HighWire-hosted journal article supplement (https://bmjopenquality.bmj.com/content/11/3/e001828)
Supplement: inline-supplementary-material-3 [file inline-supplementary-material-3.pdf]

Supplemental Table

| <b>Contributing Factor Chart</b> |                      |                                                                                                                        |
|----------------------------------|----------------------|------------------------------------------------------------------------------------------------------------------------|
| <b>Factor</b>                    | <b>Excel code</b>    | <b>Description</b>                                                                                                     |
| 1. Individual performance        |                      | Event is directly related to an individual action or lack of action                                                    |
| a. Mistake                       | IND mistake          | Errors of omission, commission or mis-action                                                                           |
| b. Judgment                      | IND judgment         | Issues with decisions made by individual staff                                                                         |
| c. Procedure                     | IND procedure        | Existing procedure, policy or guideline not followed or followed incorrectly or incompletely                           |
| d. Communication                 | IND communication    | Inadequate communication by an individual                                                                              |
| e. Other performance issue       | IND other            |                                                                                                                        |
| 2. Teamwork                      | TEAMWORK             | Event most attributable to failure to work effectively as a team including flaws in collaboration, communication, etc. |
| 3. Supervision                   | SUPERVISION          | Event at least partly due to inadequate supervision                                                                    |
| 4. Training                      | TRAINING             | Lack of adequate training for task                                                                                     |
| 5. Staffing                      | STAFFING             | Understaffing, incorrect staffing                                                                                      |
| 6. Working conditions            | WORKING CONDITIONS   | Unsuitable or unsafe conditions (e.g., poor lighting)                                                                  |
| 7. Resource availability         | RES available        | Limited supplies, unavailable or delayed supplies needed for task, e.g., platelets not available for transfusion       |
| 8. Resource quality              | RES quality          | Available product not ideal for task or defective                                                                      |
| 9. IT limitation                 | IT functionality     | Flaws or limitations in IT tool including EMR that allows or facilitates an event                                      |
| 10. Service availability         | SERVICE AVAILABILITY | Needed service was delayed or unavailable, e.g., laboratory reporting system not working                               |
| 11. Policy or protocol           |                      |                                                                                                                        |
| a. Nonexistent                   | POL nonexistent      | Needed policy or protocol does not exist                                                                               |
| b. Unavailable                   | POL unavailable      | Existing policy or protocol not available when needed                                                                  |
| c. Insufficient                  | POL insufficient     | Existing policy or protocol contains gaps, confusing or ambiguous language or is poorly designed                       |

|                                                 |                   |                                                                   |
|-------------------------------------------------|-------------------|-------------------------------------------------------------------|
| d. noncompliance                                | POL noncompliance | Existing policy or protocol not followed or not followed properly |
| e. Other policy or procedure issue              | POL other         |                                                                   |
| 12. Contributing factor not otherwise specified | CF other          | Other contributing factor                                         |
| 13. Contributing factor not identifiable        | CF unknown        |                                                                   |
