# Supplementary material
Source: HighWire-hosted journal article supplement (https://bmjopenquality.bmj.com/content/11/3/e001828)

## [Supplemental file 1]

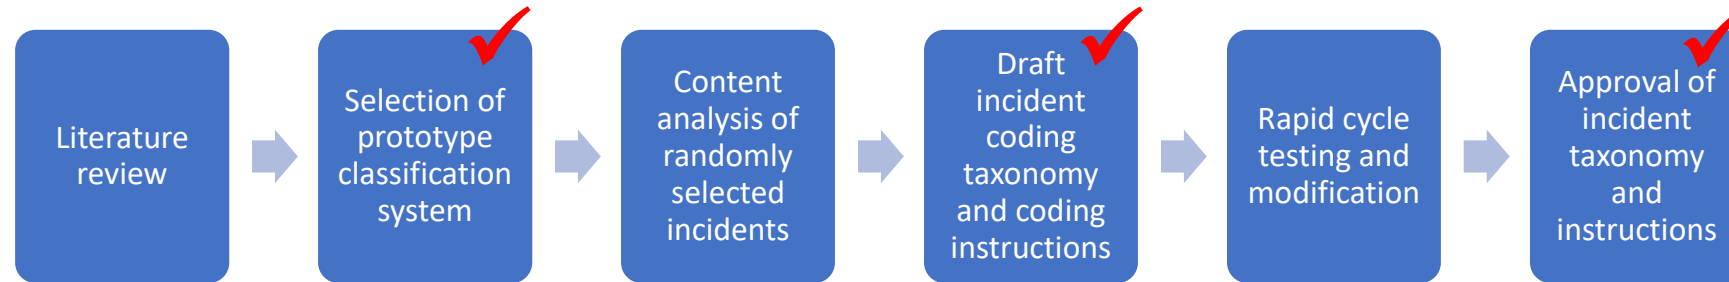

✓ Denotes Expert Advisory Group approval

Supplement: inline-supplementary-material-1 [file inline-supplementary-material-1.pdf]
